# Supplementary material
Source: publisher figshare collection journal article supplement (https://gsajournals.figshare.com/ndownloader/files/24527441)
Supplement: Supplementary file 1 [file 24527441]

## Sheet: Sheet1
TABLE S4. ORFS ASSOCIATED WITH POSITIVE M VALUES
Gene1.	ID	m. value2.	p. value	q. value3.
SLM1	YIL105C	6.84813	7.18363e-05	0.0170309
unknown	YMR075C-A	8.68156	1.40569e-05	0.00320442
TPO4	YOR273C	8.25604	4.08231e-05	0.00896142
SIP18	YMR175W	7.46982	0.000170212	0.0315265
EDE1	YBL047C	8.58017	0.00017728	0.0318406
HRB1	YNL004W	7.65952	0.000322655	0.0562464
PEX17	YNL214W	7.23115	0.000351824	0.0595788
GTT1	YIR038C	7.10001	0.000476059	0.0775387
uncharacterized	YGL114W	7.46648	0.000484045	0.0775387
unknown	YOR289W	6.86525	0.000615553	0.0935483
unknown	YOR384W	6.95986	0.000645363	0.0956267
CIS3	YJL158C	5.88591	0.000103033	0.0203558
ERV41	YML067C	1.94432	0.000147217	0.0264907
FLO10	YKR102W	2.53466	0.000160239	0.0271354
STB2	YMR053C	1.76341	0.00043675	0.0539296
RPS10B	YMR230W	7.38623	0.000706688	0.0734831
uncharacterized	YPR014C	6.53175	0.00100812	0.0911131
BTN2	YGR142W	1.59924	0.00101459	0.0911131
MMT	YMR177W	1.33796	3.50142e-06	0.00129706
IES2	YOR189W	1.5462	5.64477e-06	0.00196803
APL2	YKL135C	1.40923	7.13954e-06	0.00235089
OYE3	YPL171C	1.58108	1.10608e-05	0.00327786
UBA3	YPR066W	5.98242	1.64803e-05	0.00465137
dubious	YBR206W	2.01522	1.9366e-05	0.00510577
SYC1	YOR179C	1.12233	1.98132e-05	0.00510577
TOH1	YJL171C	1.12482	4.21399e-05	0.0104068
MHT1	YLL062C	2.14634	4.57247e-05	0.0108404
DSS4	YPR017C	1.07209	4.86857e-05	0.0110985
LDS2	YOL047C	1.49986	5.07304e-05	0.0111363
CNB1	YKL190W	1.17085	5.65935e-05	0.0119796
TAZ1	YPR140W	1.18872	7.50086e-05	0.0153302
dubious	YBR224W	2.66761	0.000104291	0.0206045
VTC2	YFL004W	1.19554	0.000130013	0.0248576
NCR1	YPL006W	1.04083	0.000141394	0.0261887
QCR6	YFR033C	1.57159	0.000154874	0.0278164
UBR2	YLR024C	2.30873	0.000210546	0.0367031
RCF2	YNR018W	3.44017	0.000222495	0.0376779
PPG1	YNR032W	2.50496	0.000230363	0.0378241
INO1	YJL153C	1.08371	0.000312256	0.0482379
GIS3	YLR094C	1.53066	0.000317408	0.0482379
DNM1	YLL001W	1.33179	0.000338814	0.0502037
MRPL35	YDR322W	3.88768	0.000382898	0.0553521
INM1	YHR046C	4.02449	0.000395646	0.0558333
SPO1	YNL012W	2.88043	0.000406496	0.0560303
MIX23	YBL107C	3.26234	0.000452586	0.0609654
dubious	YOR041C	1.3295	0.000470838	0.0620146
dubious	YPR076W	1.10233	0.00048171	0.0620673
YND1	YER005W	3.69558	0.000537554	0.0675035
RAD17	YOR368W	3.62474	0.000546679	0.0675035
REV1	YOR346W	3.76508	0.000590573	0.0706403
ATG8	YBL078C	2.85726	0.000595919	0.0706403
RUP1	YOR138C	4.46226	0.000616113	0.071602
MNN10	YDR245W	3.81646	0.000653489	0.0732963
dubious	YOR366W	2.04234	0.000655425	0.0732963
Unknown function	YIR016W	3.7191	0.000762676	0.0807211
TOS6	YNL300W	1.05635	0.000827415	0.0860366
REV3	YPL167C	3.58714	0.000845127	0.0863632
MCR1	YKL150W	2.78525	0.000862687	0.0866635
TSA1	YML028W	0.884008	0.000901279	0.0890314
dubious	YDR491C	1.0288	0.000923877	0.0897676
ATP15	YPL271W	3.59952	0.000959767	0.0917506
Unknown function	YOR268C	3.26766	0.00101932	0.09526
uncharacterized	YMR141C	1.40796	0.00104469	0.09526
FAT3	YKL187C	1.12535	0.00110601	0.0993231
TIF1	YKR059W	1.97746	2.61782e-07	0.00155158
OAF3	YKR064W	2.38616	4.86021e-05	0.0960216
1.Genes in bold are those that appeared as conferring resistance in Table 2. See Figure S1 for area under the curve for determining resistance or sensitivity.
2.m.value is the numeric vector of fold change on a log2 scale
3.q value is the numeric vector calculated based on the p-value using the p.adjust function with default parameter settings.
